## Mechanisms of $K^+$ transport across basolateral membranes of principal cells in Malpighian tubules of the yellow fever mosquito, *Aedes aegypti*

Brett N. Scott, Ming-Jiun Yu, Lenora W. Lee and Klaus W. Beyenbach\*

Department of Biomedical Sciences, Cornell University, Ithaca, NY 14853, USA

\*Author for correspondence (e-mail: kwb1@cornell.edu)

Accepted 12 February 2004

### Summary

The mechanisms of  $K^+$  entry from the hemolymph into principal cells of Malpighian tubules were investigated in the yellow fever mosquito, *Aedes aegypti*. The  $K^+$  channel blocker  $Ba^{2+}$  ( $5 \text{ mmol l}^{-1}$ ) significantly decreased transepithelial (TEP) fluid secretion ( $V_s$ ) from  $0.84 \text{ nl min}^{-1}$  to  $0.37 \text{ nl min}^{-1}$  and decreased the  $K^+$  concentration in secreted fluid from  $119.0 \text{ mmol l}^{-1}$  to  $54.3 \text{ mmol l}^{-1}$  with no change in the  $Cl^-$  concentration. Even though the  $Na^+$  concentration increased significantly from  $116.8 \text{ mmol l}^{-1}$  to  $144.6 \text{ mmol l}^{-1}$ , rates of TEP ion secretion significantly decreased for all three ions. In addition,  $Ba^{2+}$  had the following significant electrophysiological effects: it depolarized the TEP voltage ( $V_t$ ) from  $19.4 \text{ mV}$  to  $17.2 \text{ mV}$ , increased the TEP resistance ( $R_t$ ) from  $6.4 \text{ k}\Omega\text{cm}$  to  $6.9 \text{ k}\Omega\text{cm}$ , hyperpolarized the basolateral membrane voltage of principal cells ( $V_{bl}$ ) from  $-75.2 \text{ mV}$  to  $-88.2 \text{ mV}$  and increased the cell input resistance from  $363.7 \text{ k}\Omega$  to  $516.3 \text{ k}\Omega$ . These effects of  $Ba^{2+}$  reflect the block of  $K^+$  channels that, apparently, are also permeable to  $Na^+$ . Bumetanide ( $100 \mu\text{mol l}^{-1}$ ) had no effect on TEP fluid secretion and electrical resistance but significantly

decreased TEP  $K^+$  secretion, consistent with the inhibition of electroneutral  $Na^+/K^+/2Cl^-$  cotransport. TEP  $Na^+$  secretion significantly increased because other  $Na^+$  entry pathways remained active. Bumetanide plus  $Ba^{2+}$  completely inhibited TEP electrolyte and fluid secretion, with fast and slow kinetics reflecting the  $Ba^{2+}$  block of basolateral membrane  $K^+$  channels and the inhibition of  $Na^+/K^+/2Cl^-$  cotransport, respectively. The single and combined effects of  $Ba^{2+}$  and bumetanide suggest that (1)  $K^+$  channels and  $Na^+/K^+/2Cl^-$  cotransport are the primary mechanisms for bringing  $K^+$  into cells, (2)  $K^+$  channels mediate a significant  $Na^+$  influx, (3)  $Na^+$  has as many as four entry pathways and (4) the mechanisms of TEP  $K^+$  and  $Na^+$  secretion are coupled such that complete block of TEP  $K^+$  renders the epithelium unable to secrete  $Na^+$ .

Key words: transepithelial  $Na^+$  secretion, transepithelial  $K^+$  secretion, transepithelial  $Cl^-$  secretion, barium block,  $K^+$  channel, bumetanide,  $Na^+/K^+/2Cl^-$  cotransport, basolateral membrane voltage, cell input resistance, transepithelial voltage, transepithelial resistance.

### Introduction

In the past two decades, our laboratory has investigated ion secretion in Malpighian tubules of the female yellow fever mosquito, *Aedes aegypti* (Beyenbach, 1995, 2001; Beyenbach and Petzel, 1987). Our attention has focused on the mechanisms and regulation of transepithelial  $Na^+$ ,  $K^+$  and  $Cl^-$  secretion from the hemolymph into the tubule lumen. In brief, transepithelial  $Na^+$  and  $K^+$  secretion is active, passing through principal cells of the tubule that supply the energy for active transport. Transepithelial  $Cl^-$  transport is passive through the paracellular pathway and/or stellate cells.

The present study is concerned with identifying the transport pathways that mediate the entry of  $K^+$  from the hemolymph into principal cells. The  $K^+$  conductance of the basolateral membrane, which accounts for 64% of the total membrane conductance, is one pathway for  $K^+$  entry (Beyenbach and Masia, 2002; Masia et al., 2000). Although this  $K^+$

conductance can be blocked by barium, the blockade does not inhibit transepithelial  $K^+$  secretion completely (Masia et al., 2000). Thus, it was of interest to identify the  $K^+$  entry mechanism remaining in the presence of  $Ba^{2+}$ . Transport *via* the  $Na^+/K^+/2Cl^-$  cotransporter first came to mind in view of significant effects of bumetanide on transepithelial secretion of  $Na^+$  and  $K^+$  (Hegarty et al., 1991).

In the present study, we have used three experimental methods to probe the mechanism of  $K^+$  entry from hemolymph into principal cells. Using the fluid secretion assay of Ramsay (1953), we evaluated the effects of  $Ba^{2+}$  and bumetanide on the transepithelial secretion of  $K^+$ ,  $Na^+$ ,  $Cl^-$  and water. In isolated perfused Malpighian tubules, we studied the effects of  $Ba^{2+}$  and bumetanide on transepithelial voltage and resistance. Using the methods of two-electrode voltage clamp (TEVC), we examined the effects of  $Ba^{2+}$  and bumetanide on the basolateral

membrane voltage and input resistance of principal cells (Masia et al., 2000). We found two equally important routes for the entry of  $K^+$  into principal cells: (1) an electroconductive route that can be blocked by  $Ba^{2+}$  and (2) an electroneutral route *via*  $Na^+/K^+/2Cl^-$  cotransport that can be inhibited by bumetanide. The significant inhibition of transepithelial  $Na^+$  secretion by  $Ba^{2+}$  suggests that basolateral  $K^+$  channels are permeable to  $Na^+$ . The stimulation of transepithelial  $Na^+$  secretion by bumetanide and reciprocal changes in the concentrations of  $Na^+$  and  $K^+$  in secreted fluid indicate that  $Na^+$  can replace  $K^+$ . However, the tubules cease epithelial transport and fluid secretion altogether if they are prevented from secreting  $K^+$ .

### Materials and methods

#### *Mosquitoes and Malpighian tubules*

The mosquito colony was maintained as described by Pannabecker et al. (1993). Malpighian tubules were dissected from cold-anesthetized and decapitated female mosquitoes (*Aedes aegypti* L.) 3–7 days post-eclosion. A light tug on the rectum under Ringer solution (see below for composition) freed the intestine and Malpighian tubules from the abdomen. A single Malpighian tubule was then separated from the intestine using fine forceps (Dumont #5; Fine Science Tools, Foster City, CA, USA). The pinched proximal end of the tubule was subsequently removed with a pair of sharp jeweler's broaches.

When effects on transepithelial  $Na^+$ ,  $K^+$ ,  $Cl^-$  and water secretion were of interest, the tubule was studied by the methods of Ramsay (1953) and wavelength dispersive spectroscopy (Williams and Beyenbach, 1983). When effects on transepithelial voltage and resistance were of interest, the tubule was microperfused *in vitro* and studied by the method of Helman (1972). When effects on the basolateral membrane voltage and input resistance of principal cells were of interest, the tubule was studied by the method of TEVC (Masia et al., 2000).

#### *Ringer solution and drugs*

Ringer solution contained the following: 150 mmol  $l^{-1}$  NaCl, 25 mmol  $l^{-1}$  Hepes, 3.4 mmol  $l^{-1}$  KCl, 1.8 mmol  $l^{-1}$   $NaHCO_3$ , 1 mmol  $l^{-1}$   $MgCl_2$ , 1.7 mmol  $l^{-1}$   $CaCl_2$  and 5 mmol  $l^{-1}$  glucose. The pH was adjusted to 7.1 with NaOH. The osmolality was 320 mosmol  $kg^{-1}$   $H_2O$ .  $Ba^{2+}$  was used as  $BaCl_2$  at a concentration of 5 mmol  $l^{-1}$ . In these experiments, the control Ringer solution was supplemented with 15 mmol  $l^{-1}$  mannitol for osmotic balance with the experimental solution containing 5 mmol  $l^{-1}$   $BaCl_2$ . In a previous study, we determined that 5 mmol  $l^{-1}$   $Ba^{2+}$  is a saturating dose for blocking  $K^+$  channels in the basolateral membrane of principal cells (Masia et al., 2000).

Bumetanide (Sigma, St Louis, MO, USA) was dissolved in Ringer solution and used at a concentration of 100  $\mu$ mol  $l^{-1}$ . Previous attempts to obtain a dose–response curve of the effects of bumetanide were unsuccessful because the effects of

bumetanide are cumulative and irreversible. For this reason, we used the bumetanide concentration (0.1 mmol  $l^{-1}$ ) employed in a previous study (Hegarty et al., 1991).

#### *The Ramsay assay*

Each Malpighian tubule served as its own control, first under control and then under experimental conditions. Rates of transepithelial fluid secretion were measured as described previously (Hegarty et al., 1991) with the following modifications. With about 80% of the tubule length remaining in a 40  $\mu$ l droplet of Ringer solution, the open end of the tubule was pulled into the surrounding oil and gently draped around a small steel broach. Thus, fluid secreted by the tubule exited into oil, forming a droplet. The dimensions of this droplet were measured over time in order to determine volume. Cumulative secreted volume was measured every 5 min for an initial control period (see Fig. 1). Secreted volume was then removed, and the experimental agent was added to the peritubular Ringer solution. Thereafter, cumulative volume was measured again every 5 min for at least 30 min. Secreted volume was collected at the end of the experimental period.  $BaCl_2$  was added to the peritubular Ringer solution by replacing 10  $\mu$ l with Ringer solution containing 20 mmol  $l^{-1}$   $BaCl_2$ . Due to the limited water solubility of bumetanide, it was necessary to exchange 20  $\mu$ l of Ringer solution with an equal volume containing 200  $\mu$ mol  $l^{-1}$  bumetanide. The transepithelial fluid secretion rate ( $V_s$ ) was calculated as the slope of a least-squares regression line fitted to the plot of time *versus* volume secreted by the tubule over at least 30 min control and experimental periods (Fig. 1A). In the  $Ba^{2+}$  plus bumetanide study, a quadratic polynomial was fitted to the data (Fig. 1B). Here, the rate of fluid secretion was calculated by taking the derivative of the polynomial and calculating  $V_s$  at a specific time.

The concentrations of  $Na^+$ ,  $K^+$  and  $Cl^-$  in fluid secreted by Malpighian tubules and in peritubular Ringer solutions were measured against appropriate standards using the methods of wavelength dispersive spectroscopy (electron probe), as described previously (Williams and Beyenbach, 1983), with the following modifications. Dried sample spots of 30–50 pl volumes were analyzed using a JEOL 8900 electron microprobe at a beam current of 50 nA. X-rays emitted at the wavelengths of  $K^+$  and  $Cl^-$  were quantified using a pentaerythritol high-intensity crystal while those emitted at the wavelength of  $Na^+$  were measured using a thallium acid phthalate crystal. A set of standard curves was constructed by plotting known concentrations of  $Na^+$ ,  $K^+$  and  $Cl^-$ , each in a series of six standard solutions, against the number of X-ray counts per second.

#### *In vitro microperfusion of Malpighian tubules*

Malpighian tubules were perfused *in vitro* for the measurement of the transepithelial voltage ( $V_t$ ) and resistance ( $R_t$ ), as described previously (Yu and Beyenbach, 2002). The peritubular bath (500  $\mu$ l) was perfused with Ringer solution at a rate of 5.6 ml  $min^{-1}$ .  $V_t$  was measured and recorded continuously, and  $R_t$  was measured periodically when of

interest. Values of  $V_t$  and  $R_t$  are steady-state values taken between 10 min and 60 min of control and experimental periods.

#### Two-electrode voltage clamp

Measurements of the basolateral membrane voltage ( $V_{bl}$ ) and principal cell input resistance ( $R_{pc}$ ) were obtained using the methods of TEVC, as described by Masia et al. (2000) and Wu and Beyenbach (2003). Again, values of  $V_{bl}$  and  $R_{pc}$  are steady-state values taken between 10 min and 60 min of control and experimental periods. The peritubular bath (500  $\mu$ l) was perfused with Ringer solution at a rate of 2.6 ml min<sup>-1</sup>. To prevent the movement of the tubule, the bottom of the lucite bath was coated with poly-L-lysine (evaporation of 0.125 mg ml<sup>-1</sup> poly-L-lysine).

#### Statistical treatment of the data

Data are summarized as means  $\pm$  S.E.M. ( $N$ , number of observations). Since each Malpighian tubule served as its own control, experiments were analyzed with the Student's paired  $t$ -test. Significance is defined as  $P < 0.05$ .

## Results

### Effects of barium and barium plus bumetanide on transepithelial electrolyte and fluid secretion

Isolated Malpighian tubules of the female yellow fever mosquito secreted fluid spontaneously when bathed in Ringer solution. The mean rate of fluid secretion ( $V_s$ ) was 0.84 nl min<sup>-1</sup> (Fig. 1A) under control conditions, with a range from 0.71 nl min<sup>-1</sup> to 0.94 nl min<sup>-1</sup>. Fluid secretion was constant for the initial 30-min control period (Fig. 1A) when Malpighian tubules secreted a fluid with approximately equimolar concentrations of Na<sup>+</sup> and K<sup>+</sup> (Table 1). The Na<sup>+</sup> concentration in secreted fluid was 116.8 mmol l<sup>-1</sup>, i.e. 35 mmol l<sup>-1</sup> less than the Na<sup>+</sup> concentration in the peritubular Ringer solution. The K<sup>+</sup> concentration in secreted fluid was 119.0 mmol l<sup>-1</sup>, i.e. 115.6 mmol l<sup>-1</sup> more than the peritubular concentration (Table 1). Chloride was the dominant anion in secreted fluid with a concentration of 197.7 mmol l<sup>-1</sup>, i.e. 38.9 mmol l<sup>-1</sup> higher than the peritubular Cl<sup>-</sup> concentration (Table 1).

The product of  $V_s$  and the ion concentration in secreted fluid yields the rate of transepithelial ion secretion (Fig. 2B–D). The mean rate of transepithelial Na<sup>+</sup> secretion was 98.1 $\pm$ 15.6 pmol min<sup>-1</sup>, the rate of K<sup>+</sup> secretion was 99.9 $\pm$ 21.9 pmol min<sup>-1</sup>, and the rate of Cl<sup>-</sup> secretion was 166.6 $\pm$ 9.5 pmol min<sup>-1</sup> ( $N=7$  tubules; Fig. 2).

The addition of 5 mmol l<sup>-1</sup> BaCl<sub>2</sub> to the peritubular Ringer bath significantly reduced  $V_s$  to 44% of control values, from 0.84 nl min<sup>-1</sup> (control) to 0.37 nl min<sup>-1</sup>, with a range from 0.28 nl min<sup>-1</sup> to 0.44 nl min<sup>-1</sup> (Figs 1A, 2A; Table 1). The reduced rate of  $V_s$  was constant for as long as it was studied, i.e. 60 min, with negligible fluctuations in  $V_s$  in the presence of BaCl<sub>2</sub> (Fig. 1A).

Barium affected the ionic composition of secreted fluid

Table 1. Single and combined effects of barium and bumetanide on transepithelial electrolyte and fluid secretion in isolated Malpighian tubules of the yellow fever mosquito, *Aedes aegypti*

|                                                    | Electrolytes in secreted fluid          |                                            |                                           |                                            | Transepithelial      |                            | Principal cell                    |                                |
|----------------------------------------------------|-----------------------------------------|--------------------------------------------|-------------------------------------------|--------------------------------------------|----------------------|----------------------------|-----------------------------------|--------------------------------|
|                                                    | Fluid secretion (nl min <sup>-1</sup> ) | [Na <sup>+</sup> ] (mmol l <sup>-1</sup> ) | [K <sup>+</sup> ] (mmol l <sup>-1</sup> ) | [Cl <sup>-</sup> ] (mmol l <sup>-1</sup> ) | Voltage (mV)         | Resistance (k $\Omega$ cm) | Basolateral membrane voltage (mV) | Input resistance (k $\Omega$ ) |
| Control                                            | 0.84 $\pm$ 0.03 (7)                     | 116.8 $\pm$ 16.2 (7)                       | 119.0 $\pm$ 27.2 (7)                      | 197.7 $\pm$ 8.3 (7)                        | 19.4 $\pm$ 8.3 (11)  | 6.37 $\pm$ 0.64 (11)       | -75.2 $\pm$ 4.7 (12)              | 363.7 $\pm$ 18.4 (12)          |
| Ba <sup>2+</sup> (0.5 mmol l <sup>-1</sup> )       | 0.37 $\pm$ 0.03* (7)                    | 144.6 $\pm$ 7.3* (7)                       | 54.3 $\pm$ 28.7* (7)                      | 192.4 $\pm$ 10.3 (7)                       | 17.2 $\pm$ 3.6* (11) | 6.87 $\pm$ 0.81* (11)      | -88.2 $\pm$ 5.2* (12)             | 516.3 $\pm$ 29.9* (12)         |
| Control <sup>1</sup>                               | 1.15 $\pm$ 0.08 (14)                    | 110.4 $\pm$ 6.8 (14)                       | 88.0 $\pm$ 6.8 (14)                       | 221.1 $\pm$ 5.2 (14)                       | 52.1 $\pm$ 8.1 (8)   | 11.6 $\pm$ 2.0 (8)         | NM                                | NM                             |
| Bumetanide (0.1 mol l <sup>-1</sup> ) <sup>1</sup> | 1.01 $\pm$ 0.14 (14)                    | 169.5 $\pm$ 9.2* (14)                      | 33.2 $\pm$ 7.1* (14)                      | 223.0 $\pm$ 5.0 (14)                       | 64.6 $\pm$ 7.3* (8)  | 12.4 $\pm$ 1.8* (8)        | NM                                | NM                             |
| Control                                            | 0.61 $\pm$ 0.02 (6)                     | 93.8 $\pm$ 8.8 (6)                         | 55.1 $\pm$ 8.7 (6)                        | 150.3 $\pm$ 9.9 (6)                        | 30.4 $\pm$ 8.1 (7)   | 11.0 $\pm$ 2.1 (7)         | -78.4 $\pm$ 4.6 (6)               | 314.9 $\pm$ 27.9 (6)           |
| Ba <sup>2+</sup> plus bumetanide                   | 0.06 $\pm$ 0.02* (6)                    | 120.4 $\pm$ 5.1* (6)                       | 25.3 $\pm$ 2.4* (6)                       | 140.5 $\pm$ 8.7 (6)                        | 38.2 $\pm$ 3.0* (7)  | 13.6 $\pm$ 2.1* (7)        | -59.3 $\pm$ 6.5* (6)              | 464.9 $\pm$ 39.0* (6)          |

Values are means  $\pm$  S.E.M. ( $N$ ). For fluid and electrolyte data collected by the method of Ramsay, each tubule served as its own control. Secreted fluid was collected after the usual 30 min control period and then again 20–70 min later after barium and/or bumetanide had been added to the peritubular Ringer. Voltage is measured with respect to ground in the peritubular bath.

<sup>1</sup>Data from Hegarty et al. (1991); \*  $P < 0.05$ ; NM, not measured.

(Table 1). The  $\text{Na}^+$  concentration in secreted fluid significantly increased from  $116.8 \text{ mmol l}^{-1}$  (control) to  $144.6 \text{ mmol l}^{-1}$ , and the  $\text{K}^+$  concentration significantly decreased from  $119.0 \text{ mmol l}^{-1}$  (control) to  $54.3 \text{ mmol l}^{-1}$ .  $\text{Ba}^{2+}$  had no significant effect on the  $\text{Cl}^-$  concentration in secreted fluid (Table 1).

The product of  $V_s$  and ion concentration revealed significant effects of  $\text{Ba}^{2+}$  on transepithelial secretion rates of all three ions (Fig. 2B–D). The rate of transepithelial  $\text{Na}^+$  secretion

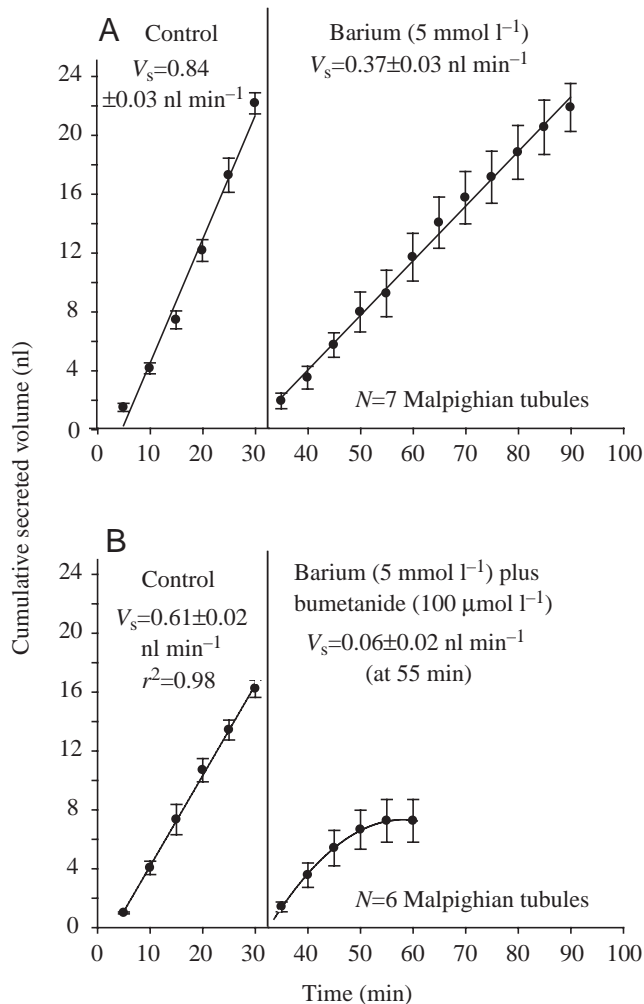

Fig. 1. Transepithelial fluid secretion in isolated Malpighian tubules of female yellow fever mosquitoes studied by the method of Ramsay (1953). Cumulative secreted volume is plotted against time first under control conditions and then in the presence of (A)  $\text{Ba}^{2+}$  and (B)  $\text{Ba}^{2+}$  plus bumetanide. After the usual initial 30 min control period, fluid secreted by the tubules was removed for analysis with an electron microprobe, and  $5 \text{ mmol l}^{-1}$   $\text{BaCl}_2$  (A) or  $5 \text{ mmol l}^{-1}$   $\text{BaCl}_2$  plus  $100 \mu\text{mol l}^{-1}$  bumetanide (B) was added to the peritubular Ringer solution. Fluid secreted under experimental conditions was collected at the end of the experiment, 25–70 min after introducing the agent of interest to the peritubular Ringer bath. The slope of regression lines yields the flow rate from the open end of the tubule, which equals the rate of transepithelial fluid secretion. Each tubule is used as its own control. Values are means  $\pm$  S.E.M.

decreased to 55% of control values, from  $98.1 \text{ pmol min}^{-1}$  to  $53.8 \pm 4.4 \text{ pmol min}^{-1}$ . The rate of  $\text{K}^+$  secretion decreased even more, to 20% of control values, from  $99.9 \text{ pmol min}^{-1}$  to  $19.5 \pm 10.6 \text{ pmol min}^{-1}$ , and the rate of  $\text{Cl}^-$  secretion decreased to 43% of control values, from  $166.6 \text{ pmol min}^{-1}$  to  $71.4 \pm 6.0 \text{ pmol min}^{-1}$  (Fig. 2B–D).

Although the  $\text{Ba}^{2+}$  block of  $\text{K}^+$  channels in the basolateral membrane of principal cells substantially reduced transepithelial  $\text{K}^+$  secretion, it did not completely inhibit  $\text{K}^+$  secretion (Fig. 2C). For this reason, we searched for the transepithelial  $\text{K}^+$  transport pathway remaining in the presence of  $\text{Ba}^{2+}$ . In these experiments, the control rate of fluid secretion was  $0.61 \text{ nl min}^{-1}$  with a range from  $0.56 \text{ nl min}^{-1}$  to  $0.68 \text{ nl min}^{-1}$  (Fig. 1B; Table 1). The addition of  $5 \text{ mmol l}^{-1}$   $\text{Ba}^{2+}$  plus bumetanide ( $100 \mu\text{mol l}^{-1}$ ) led  $V_s$  to decrease progressively, reaching the lowest detectable rate of fluid secretion,  $0.06 \text{ nl min}^{-1}$ , about 25 min after adding these two agents to the peritubular bath (Table 1). After 30 min,  $V_s$  had decreased to zero for all six Malpighian tubules tested (Fig. 1B). Since a new steady state was never obtained, we estimated  $V_s$  as the derivative of the secreted volume that had accumulated 25 min after the addition of barium and bumetanide to the peritubular bath (Fig. 1B; Table 1).

In the presence of barium plus bumetanide, the  $\text{Na}^+$  concentration in secreted fluid significantly increased from  $93.8 \text{ mmol l}^{-1}$  to  $120.4 \text{ mmol l}^{-1}$ , and the  $\text{K}^+$  concentration significantly decreased from  $55.1 \text{ mmol l}^{-1}$  to  $25.3 \text{ mmol l}^{-1}$  (Table 1). The concentration of  $\text{Cl}^-$  in secreted fluid did not change significantly:  $150.3 \text{ mmol l}^{-1}$  versus  $140.5 \text{ mmol l}^{-1}$  (Table 1). These data are qualitatively similar to those observed in the presence of  $\text{Ba}^{2+}$  alone.

The product of  $V_s$  and ion concentration in the presence of  $\text{Ba}^{2+}$  plus bumetanide showed profound effects on transepithelial ion secretion rates (Fig. 2). After 25 min of the experimental period, transepithelial  $\text{Na}^+$  secretion had dropped to values 12% of control, from  $57.8 \pm 5.5 \text{ pmol min}^{-1}$  (control) to  $7.1 \pm 2.9 \text{ pmol min}^{-1}$  ( $N=6$ ; Fig. 2B). At the same time, transepithelial  $\text{K}^+$  secretion had fallen to 4% of control, from  $34.3 \pm 5.9 \text{ pmol min}^{-1}$  (control) to  $1.36 \pm 0.5 \text{ pmol min}^{-1}$  ( $N=6$ ; Fig. 2C) and  $\text{Cl}^-$  secretion had decreased to 9% of control values, from  $92.8 \pm 6.3 \text{ pmol min}^{-1}$  (control) to  $8.1 \pm 3.0 \text{ pmol min}^{-1}$  ( $N=6$ ; Fig. 2C). After 30 min in the presence of  $\text{Ba}^{2+}$  plus bumetanide, transepithelial transport rates for all three ions were reduced to zero.

#### *Effect of barium and barium plus bumetanide on tubule electrophysiology*

In isolated perfused Malpighian tubules, the control transepithelial voltage ( $V_t$ ) was  $19.4 \text{ mV}$  (lumen-positive), and the transepithelial resistance ( $R_t$ ) was  $6.37 \text{ k}\Omega\text{cm}$  (Table 1). In principal cells studied by the methods of TEVC, the control basolateral membrane voltage ( $V_{bl}$ ) was  $-75.2 \text{ mV}$ , and the input resistance of principal cells ( $R_{pc}$ ) was  $363.7 \text{ k}\Omega$  (Table 1). The difference between  $V_t$  and  $V_{bl}$  is the apical membrane voltage,  $94.6 \text{ mV}$ .

Peritubular  $\text{Ba}^{2+}$  significantly depolarized  $V_t$  from  $19.4 \text{ mV}$

Fig. 2. Single and combined effects of barium (Ba;  $5 \text{ mmol l}^{-1}$ ) and bumetanide (Bu;  $100 \mu\text{mol l}^{-1}$ ) on transepithelial ion secretion in isolated Malpighian tubules of the yellow fever mosquito. After the usual initial 30 min control period, fluid secreted by the tubules was removed for analysis with an electron microprobe, and barium and/or bumetanide was added to the peritubular Ringer solution. Fluid secreted under experimental conditions was collected at the end of the experiment, 25–70 min after introducing the agent of interest to the peritubular Ringer bath. Data are expressed as % of control.  $N=7$  for C and Ba;  $N=6$  for Bu and Ba+Bu. For numeric data, see Table 1. Asterisks indicate significant differences ( $P<0.05$ ). Effects of bumetanide alone are previously published data (Hegarty et al., 1991).

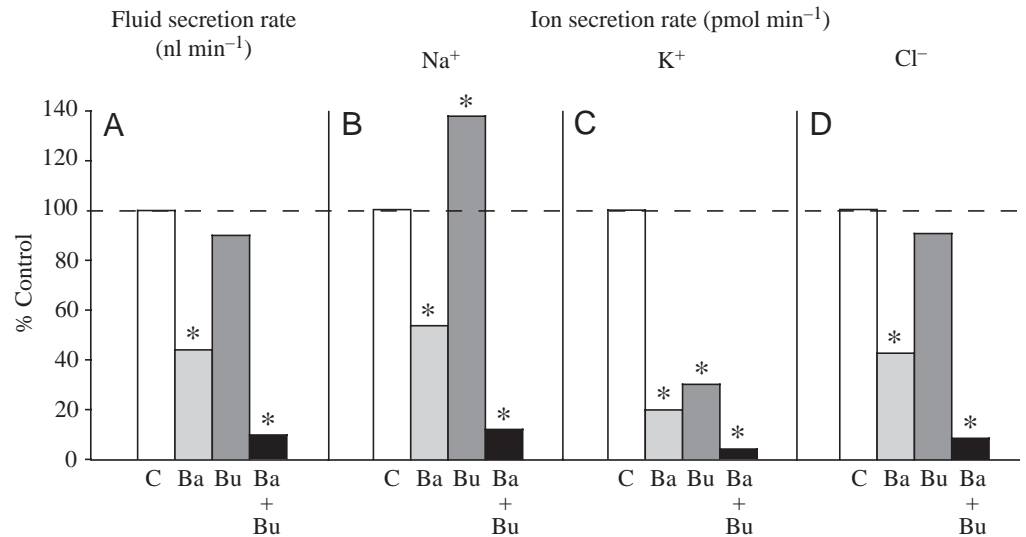

to 17.2 mV and significantly increased  $R_t$  from 6.37  $\text{k}\Omega\text{cm}$  to 6.87  $\text{k}\Omega\text{cm}$  (Table 1). In addition,  $5 \text{ mmol l}^{-1} \text{ Ba}^{2+}$  significantly hyperpolarized  $V_{bl}$  from  $-75.2 \text{ mV}$  to  $-88.2 \text{ mV}$  and significantly increased  $R_{pc}$  from 363.7  $\text{k}\Omega$  to 516.3  $\text{k}\Omega$ .

The effects of barium on  $V_t$ ,  $V_{bl}$ ,  $R_t$  and  $R_{pc}$  were immediate, as rapid as the peritubular batch could be changed to include  $\text{Ba}^{2+}$ . Moreover,  $\text{Ba}^{2+}$  elicited these effects in a single step, i.e. there were no secondary time-dependent effects. Likewise, the off-effects upon  $\text{Ba}^{2+}$  washout were immediate and complete, displaying simple kinetics of an open channel block, as in previous studies (Beyenbach and Masia, 2002; Masia et al., 2000; Wu and Beyenbach, 2003).

Peritubular  $\text{Ba}^{2+}$  plus bumetanide had the following effects measured after 25 min of treatment: in isolated perfused Malpighian tubules, the control  $V_t$  was 30.4 mV and the control  $R_t$  was 11.0  $\text{k}\Omega\text{cm}$  (Table 1). In principal cells studied by the methods of TEVC, the control  $V_{bl}$  was  $-78.4 \text{ mV}$  while the control  $R_{pc}$  was 314.9  $\text{k}\Omega$  (Table 1). The addition of  $\text{Ba}^{2+}$  plus bumetanide to the peritubular bath significantly hyperpolarized  $V_t$  from 30.4 mV to 38.2 mV and significantly increased  $R_t$  from 11.0  $\text{k}\Omega\text{cm}$  to 13.6  $\text{k}\Omega\text{cm}$  (Table 1).  $V_{bl}$  significantly depolarized from  $-78.4 \text{ mV}$  to  $-59.3 \text{ mV}$  and significantly increased  $R_{pc}$  from 314.9  $\text{k}\Omega$  to 464.9  $\text{k}\Omega$  (Table 1). The time course of the electrophysiological effects of  $\text{Ba}^{2+}$  and bumetanide mirrored the time course of the effects on electrolyte and fluid secretion.

### Discussion

The present study identifies two pathways for the entry of  $K^+$  into principal cells across the basolateral membrane: one electroconductive, the other electroneutral.  $K^+$  channels are identified on the basis of channel block by barium (Fig. 3), which inhibits 80% of transepithelial  $K^+$  secretion and has significant effects on voltage and resistance (Table 1). The

electroneutral transport step is identified by the effects of bumetanide, a known blocker of  $\text{Na}^+/\text{K}^+/\text{2Cl}^-$  cotransport. In a previous study, bumetanide inhibited 70% of transepithelial  $K^+$  secretion without significant effects on transepithelial electrical resistance (Hegarty et al., 1991). In the present study, the co-administration of barium and bumetanide completely inhibited transepithelial  $K^+$  secretion, revealing no other transepithelial  $K^+$  transport mechanisms.

The inhibitory effects of barium on insect Malpighian tubules have been observed in the locust (Hyde et al., 2001), ant (Leyssens et al., 1994), fruitfly (Wessing et al., 1993), beetle (Nicoloson and Isaacson, 1987), mealworm (Wiehart et al., 2003a), cricket (Xu and Marshall, 1999a) and weta (Neufeld and Leader, 1998). The present study corroborates the consensus that  $\text{Ba}^{2+}$ -sensitive  $K^+$  channels mediate the entry of  $K^+$  across the basolateral membrane of principal cells in Malpighian tubules. The  $K^+$  conductance of the basolateral membrane is so large that intracellular  $K^+$  is at or near electrochemical equilibrium with extracellular  $K^+$  in the hemolymph or peritubular Ringer solution (Janowski et al., 2001; Leyssens et al., 1993).

Effects of the loop diuretics bumetanide and furosemide on insect Malpighian tubules have been reported in the mealworm (Wiehart et al., 2003b), blowfly (O'Donnell and Maddrell, 1984), fruit fly (Linton and O'Donnell, 1999), tobacco hornworm (Audsley et al., 1993; Reagan, 1995), ant (Leyssens et al., 1994), locust (Baldrick et al., 1988) and cricket (Xu and Marshall, 1999b). The consensus of these studies is that bumetanide and furosemide inhibit  $\text{Na}^+/\text{K}^+/\text{2Cl}^-$  and/or  $\text{K}^+/\text{Cl}^-$  cotransport systems (Baldrick et al., 1988; Gillen and Bowles, 2001; Leyssens et al., 1994) in the basolateral membrane, thereby preventing the entry of  $\text{NaCl}$  and/or  $\text{KCl}$  into the cell. The present study is consistent with this conclusion. However, the evidence for  $\text{Na}^+/\text{K}^+/\text{2Cl}^-$  cotransport is merely pharmacological because this transporter has not been isolated

from and/or cloned in any insect Malpighian tubule. In Malpighian tubules of *Aedes aegypti*, bumetanide was found to significantly inhibit transepithelial  $K^+$  secretion without affecting transepithelial resistance and the fractional resistance of the basolateral membrane, which is consistent with an effect on a non-conductive transport pathway such as that of an electroneutral transport system (Hegarty et al., 1991).

More importantly, the present study illustrates that inhibitors of  $K^+$  transport significantly increase the transepithelial secretion of  $Na^+$  and  $Cl^-$ . In what follows, we will seek

explanations for the effects of barium and bumetanide on transepithelial  $Na^+$ ,  $K^+$  and  $Cl^-$  secretion that are consistent with the present data and present models of transepithelial electrolyte transport in Malpighian tubules of *Aedes aegypti*.

#### *Inhibition of transepithelial $K^+$ and fluid secretion by barium*

The addition of the  $K^+$  channel blocker  $Ba^{2+}$  to the peritubular bath promptly reduced the rate of fluid secretion to 44% of control values together with significant reductions in the rates of transepithelial  $Na^+$ ,  $K^+$  and  $Cl^-$  secretion

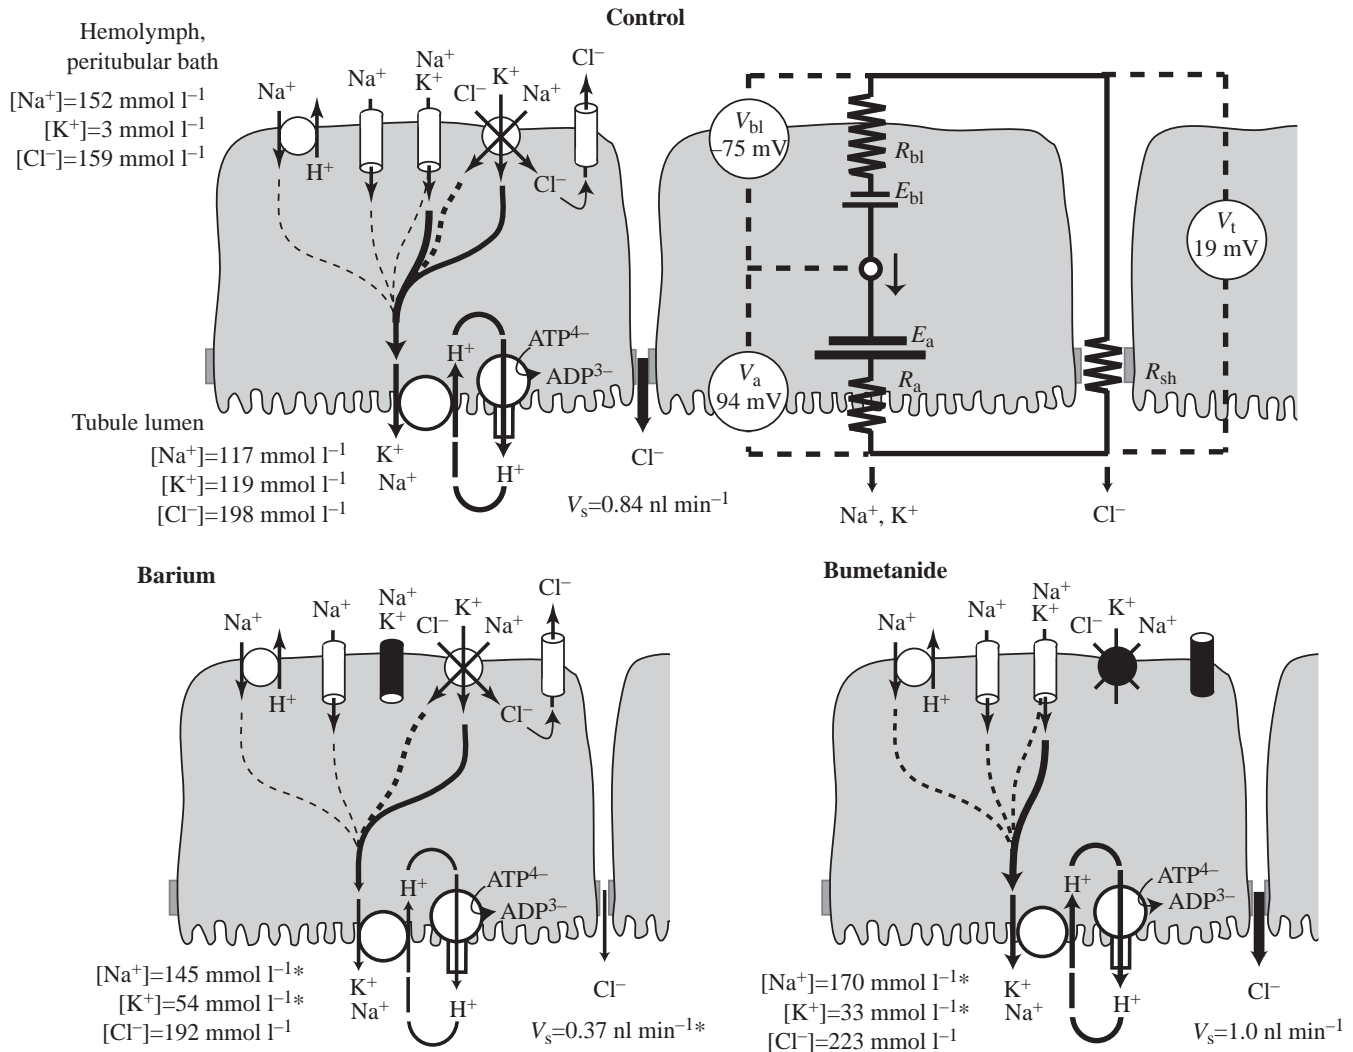

Fig. 3. Models of transepithelial  $NaCl$  and  $KCl$  secretion in Malpighian tubules of *Aedes aegypti*. The cations  $Na^+$  and  $K^+$  take a transcellular pathway and  $Cl^-$  takes a paracellular shunt pathway. Transcellular and paracellular pathways are electrically coupled, forming an intraepithelial current loop. The current generator is the V-type  $H^+$ -ATPase located in the apical membrane of principal cells (Beyenbach, 2001). Current across the apical membrane is carried by  $H^+$ . Current returning to the cytoplasmic face of the V-type  $H^+$ -ATPase is carried by  $Cl^-$  ions passing from the hemolymph to the tubule lumen through the paracellular pathway, by  $K^+$  and  $Na^+$  entering the cell across the basolateral membrane and by  $Cl^-$  leaving the cell through  $Cl^-$  channels (Yu et al., 2003). Barium blocks basolateral membrane  $K^+$  channels, thereby increasing the resistance of the basolateral membrane ( $R_{bl}$ ) and decreasing the loop current. The net effect is the inhibition of transepithelial  $NaCl$ ,  $KCl$  and fluid secretion. Bumetanide blocks  $Na^+/K^+/2Cl^-$  cotransport across the basolateral membrane, leaving electroconductive pathways largely intact. As a result, intraepithelial current flow is not affected and rates of transepithelial cation, anion and fluid secretion remain unchanged. However, rates of transepithelial  $K^+$  secretion decrease and  $Na^+$  secretion increase because one major pathway for  $K^+$  entry is blocked, leaving three other  $Na^+$  entry pathways open.  $V_s$ , rate of fluid secretion;  $E$ , electromotive force;  $V$ , voltage;  $R$ , resistance; a, apical membrane; bl, basolateral membrane; sh, epithelial shunt; t, transepithelial.

(Fig. 2). The block of basolateral membrane  $K^+$  channels is expected to reduce the entry of  $K^+$  into principal cells, thereby limiting intracellular  $K^+$  for secretion into the tubule lumen (Fig. 3). Accordingly, the rate of transcellular  $K^+$  transport is inhibited by 80%. Clearly,  $K^+$  channels provide a major route for  $K^+$  entry into the cell. They account for 64% of the total conductance of the basolateral membrane (Beyenbach and Masia, 2002). When these  $K^+$  channels are blocked by  $Ba^{2+}$  in Malpighian tubules of ants, the intracellular  $K^+$  concentration drops from  $88 \text{ mmol l}^{-1}$  to  $73 \text{ mmol l}^{-1}$  (Leyssens et al., 1993). A similar drop in the intracellular  $K^+$  concentration of *Aedes* Malpighian tubules reduces the driving force for  $K^+$  extrusion across the apical membrane, explaining in part why the  $K^+$  concentration in secreted fluid drops from  $119 \text{ mmol l}^{-1}$  to  $54 \text{ mmol l}^{-1}$  in the presence of  $Ba^{2+}$  (Table 1).

#### *Inhibition of transepithelial $K^+$ secretion by bumetanide*

In a previous study, we saw no effect of bumetanide ( $0.1 \text{ mmol l}^{-1}$ ) on transepithelial fluid secretion (Hegarty et al., 1991). However, an examination of secreted fluid revealed significant effects on the concentrations of  $Na^+$  and  $K^+$  in secreted fluid (Table 1). Bumetanide decreased the  $K^+$  concentration by  $60 \text{ mmol l}^{-1}$  but increased the  $Na^+$  concentration by a similar amount with no change in total cation concentration and hence no change in the concentration of secreted  $Cl^-$ . Thus, measures of fluid secretion as the only bioassay can be misleading. For this reason, the parallel study of ion concentrations and electrophysiology offers details that otherwise would be missed in the Ramsay assay.

Since the  $K^+$  concentration in secreted fluid decreased and the  $Na^+$  concentration increased, it follows that bumetanide decreased the rate of transepithelial  $K^+$  secretion and increased the rate of  $Na^+$  secretion (Table 1; Fig. 2). Significantly, bumetanide inhibited  $K^+$  secretion by 70%, similar to the inhibition measured in the presence of  $Ba^{2+}$  (Fig. 2). Bumetanide is known to inhibit  $Na^+/K^+/2Cl^-$  cotransport in Malpighian tubules (Baldrick et al., 1988; Hegarty et al., 1991; Ianowski et al., 2001; Leyssens et al., 1994; Reagan, 1995; Wiehart et al., 2003a). Hence, the inhibition of  $K^+$  secretion to levels similar to those observed in the presence of  $Ba^{2+}$  reveals that  $Na^+/K^+/2Cl^-$  transport is as important a route for  $K^+$  entry as are  $K^+$  channels. Moreover, the complete inhibition of transepithelial  $K^+$  secretion by the co-administration of  $Ba^{2+}$  and bumetanide identifies channel- and carrier-mediated transport as the two major, if not exclusive, mechanisms for bringing  $K^+$  into the cell across the basolateral membrane.

The inhibition of transepithelial  $K^+$  secretion by 80% in the presence of barium and by 70% in the presence of bumetanide suggests that carrier- and channel-mediated  $K^+$  entry pathways are functionally coupled, where effects on  $K^+$  channels affect  $Na^+/K^+/2Cl^-$  cotransport and *vice versa*.

#### *Inhibition of transepithelial $Na^+$ secretion by barium*

The significant inhibition of transepithelial  $Na^+$  secretion by

barium can be explained by (1) the general reduction in transepithelial electrogenic ion transport as barium blocks a major conductive pathway and (2)  $K^+$  channels that permit the passage of  $Na^+$ .

As shown in Fig. 3, transepithelial secretion of  $NaCl$  and  $KCl$  can be modeled with an electrical circuit consisting of a transcellular pathway that mediates active transport of  $K^+$  and  $Na^+$  and a paracellular pathway that mediates passive transport of  $Cl^-$ . Transcellular and paracellular pathways are electrically coupled, forming an intraepithelial circuit where cationic current ( $Na^+$  and  $K^+$ ) passing through principal cells is the same as anionic current ( $Cl^-$ ) through the paracellular pathway. The  $Ba^{2+}$  block of  $K^+$  channels significantly increases the input resistance of principal cells from  $363.7 \text{ k}\Omega$  to  $516.3 \text{ k}\Omega$ , reflecting the substantial increase in the resistance of the basolateral membrane (Table 1). The large increase in basolateral membrane resistance is expected to decrease transcellular cationic current and, consequently, paracellular current (Fig. 3). Indeed, estimates of transcellular and paracellular currents, or the intraepithelial loop current, show significant reductions in the presence of  $Ba^{2+}$  (Wu and Beyenbach, 2003). Thus, as loop current decreases, the rate of  $K^+$  and  $Na^+$  transport through principal cells decreases and the rate of  $Cl^-$  transport decreases. Direct measurements of transepithelial  $Na^+$ ,  $K^+$  and  $Cl^-$  secretion confirm this to be the case (Fig. 2). Moreover, significant reductions in transepithelial  $NaCl$  and  $KCl$  secretion have the effect of bringing less water into the tubule lumen, hence the decrease in fluid secretion in the presence of  $Ba^{2+}$  (Figs 1, 2).

$Ba^{2+}$  may also affect transepithelial  $Na^+$  secretion directly. Ion channels are never perfectly ion-selective. Some epithelial  $K^+$  channels can be highly selective for  $K^+$  with  $K^+/Na^+$  permeability ratios as high as 100 (Hurst et al., 1992). Other  $K^+$  channels admit  $Na^+$  more readily, with  $K^+/Na^+$  permeability ratios as low as 13 (Teulon et al., 1994), 10 (Suzuki et al., 1994) or 5 (Labarca et al., 1996). A similar low  $K^+/Na^+$  permeability ratio of  $K^+$  channels in the basolateral membrane of *Aedes* Malpighian tubules would allow a substantial  $Na^+$  influx in view of the high electrochemical driving force ( $\sim 100 \text{ mV}$ ), supporting the entry of  $Na^+$  into the cell. The  $Ba^{2+}$  block of basolateral membrane  $K^+$  channels would then be expected to inhibit not only  $K^+$  entry and transepithelial  $K^+$  secretion but also  $Na^+$  entry and transepithelial  $Na^+$  secretion. Accordingly, the significant inhibition of transepithelial  $Na^+$  secretion by  $Ba^{2+}$  suggests that  $K^+$  channels in the basolateral membrane of principal cells offer some permeability to  $Na^+$  (Figs 2B, 3).

#### *Stimulation of transepithelial $Na^+$ secretion by bumetanide*

The inhibition of  $Na^+/K^+/2Cl^-$  cotransport across the basolateral membrane is expected to decrease  $Na^+$  entry into the cell and to decrease transepithelial  $Na^+$  secretion, like  $K^+$  (Fig. 3). Paradoxically, the opposite is observed. Bumetanide significantly stimulates transepithelial  $Na^+$  secretion, from  $122 \text{ pmol min}^{-1}$  to  $169 \text{ pmol min}^{-1}$  (Hegarty et al., 1991). Hypothetical solutions to this paradox give a glimpse at the

relative roles of several pathways available to  $\text{Na}^+$  for entering the cell.

Since  $\text{Na}^+/\text{K}^+/\text{2Cl}^-$  cotransport is a major pathway for  $\text{K}^+$  entry into the cell (Fig. 3), bumetanide inhibition is expected to lower the intracellular  $\text{K}^+$  concentration. Consistent with this hypothesis is the significant depolarization of the basolateral membrane voltage from 63 mV to 51 mV, reflecting the drop in the  $\text{K}^+$ -diffusion potential across the basolateral membrane (Hegarty et al., 1991). Direct measurements of intracellular  $\text{K}^+$  concentrations in Malpighian tubules of the locust show that furosemide, which blocks  $\text{Na}^+/\text{K}^+/\text{2Cl}^-$  cotransport like bumetanide, causes intracellular  $\text{K}^+$  concentration to fall and to be replaced by  $\text{Na}^+$  (Hopkin et al., 2001). Likewise, intracellular  $\text{Na}^+$  replaces  $\text{K}^+$  in Malpighian tubules of *Rhodnius* that are stimulated to secrete  $\text{Na}^+$  in the presence of serotonin (Ianowski et al., 2001). Similar reciprocal changes in intracellular  $\text{K}^+$  and  $\text{Na}^+$  concentrations in the presence of bumetanide in Malpighian tubules of *Aedes aegypti* would be expected to lead to the observed decrease in the  $\text{K}^+$  concentration and the increase in the  $\text{Na}^+$  concentration in secreted fluid (Fig. 2). Even though bumetanide blocks the entry of both  $\text{K}^+$  and  $\text{Na}^+$  into the cell, the intracellular  $\text{Na}^+$  can still rise because three other pathways for  $\text{Na}^+$  entry remain open: (1)  $\text{Na}^+/\text{H}^+$  exchange transport (Hegarty et al., 1992; Petzel, 2000), (2) an  $\text{Na}^+$  conductance that accounts for 16% of the total conductance of the basolateral membrane (Beyenbach and Masia, 2002) and (3)  $\text{K}^+$  channels that apparently allow the passage of some  $\text{Na}^+$  (Fig. 3). Of these three,  $\text{Na}^+$  entry via  $\text{Na}^+/\text{H}^+$  exchange is probably the most important pathway because amiloride, a blocker of  $\text{Na}^+/\text{H}^+$  exchange, inhibits transepithelial  $\text{Na}^+$  secretion by 70% (Hegarty et al., 1992).

#### Summary and remaining questions

$\text{Ba}^{2+}$  inhibits not only transepithelial  $\text{K}^+$  secretion but also transepithelial  $\text{Na}^+$  and  $\text{Cl}^-$  secretion. By blocking  $\text{K}^+$  channels that offer some permeability to  $\text{Na}^+$ , barium reduces the transcellular cationic current from hemolymph to tubule lumen (Fig. 3, circuit diagram). Since the return current is carried by  $\text{Cl}^-$ , also passing from hemolymph to tubule lumen, it follows that barium reduces transepithelial  $\text{Cl}^-$  secretion.

In as much as basolateral membrane  $\text{K}^+$  channels are more permeable to  $\text{K}^+$  than to  $\text{Na}^+$ , barium inhibits transepithelial  $\text{K}^+$  secretion to a greater degree than  $\text{Na}^+$  secretion (Fig. 2). Nevertheless, the  $\text{Na}^+$  concentration in secreted fluid rises because  $\text{K}^+$  channels provide but one minor pathway for transepithelial  $\text{Na}^+$  secretion in the presence of multiple other  $\text{Na}^+$  entry mechanisms across the basolateral membrane (Table 1; Fig. 2). In spite of the increase in the luminal  $\text{Na}^+$  concentration, transepithelial  $\text{Na}^+$  secretion decreases because of the overriding reduction in the intraepithelial loop current by barium (Fig. 3, circuit diagram).

By contrast, bumetanide leaves electroconductive pathways intact. As a result, bumetanide has no effect on transepithelial resistance, no effect on the fractional resistance of the basolateral membrane (Hegarty et al., 1991), no effect on

intraepithelial loop current, no effect on transepithelial total cation secretion and no effect on  $\text{Cl}^-$  and fluid secretion. Total transepithelial cation secretion did not change, but transepithelial  $\text{Na}^+$  secretion significantly increased with an equivalent decrease in  $\text{K}^+$  secretion. Bumetanide blocks one of two major  $\text{K}^+$  entry pathways, but only one of four  $\text{Na}^+$  entry pathways, bringing about reciprocal changes in intracellular and luminal  $\text{K}^+$  and  $\text{Na}^+$  concentrations and, consequently, the inhibition of  $\text{K}^+$  secretion and the stimulation of  $\text{Na}^+$  secretion.

Finally, the electrophysiological data are consistent with  $\text{Ba}^{2+}$  blocking an electroconductive pathway such as that provided by  $\text{K}^+$  channels in the basolateral membrane of principal cells. Upon the addition of  $\text{Ba}^{2+}$  to the peritubular medium, the observed changes in transepithelial voltage and resistance and basolateral membrane voltage and resistance are internally consistent with channel block. By contrast, bumetanide had no effect on epithelial or membrane resistance, and the small changes in transepithelial and membrane voltage can be accounted for by changing intracellular  $\text{K}^+$  concentrations. Moreover, the kinetics of the inhibitions suggest two distinct mechanisms of action. Rapid kinetics of the effects of  $\text{Ba}^{2+}$  evince channel block, and slow kinetics of the effects of bumetanide are consistent with the inhibition of a carrier.

One question that this study leaves open is how bumetanide blocks the cAMP stimulation of transepithelial  $\text{Na}^+$  secretion, which we have observed in a previous study (Hegarty et al., 1991). In *Aedes* Malpighian tubules, corticotropin-releasing factor (CRF)-like diuretic peptides and their second messenger cAMP selectively increase transepithelial  $\text{NaCl}$  secretion by activating an  $\text{Na}^+$  conductance in the basolateral membrane of principal cells (Beyenbach, 2001; Petzel et al., 1985, 1987; Williams and Beyenbach, 1983, 1984). How the blockade of the  $\text{Na}^+/\text{K}^+/\text{2Cl}^-$  cotransporter brings about the blockade of  $\text{Na}^+$  channels is unclear at present. However, it is known that the  $\text{Na}^+/\text{K}^+/\text{2Cl}^-$  cotransporter interacts with channels, such that effects on one will also affect the other (O'Neill and Steinberg, 1995; Brzuszcak et al., 1996; Marunaka et al., 1999; Huang et al., 2000; Singh et al., 2001; Walter et al., 2001; Wang, 2003). It is conceivable that a similar coupling of carrier and channels prevents the activation of  $\text{Na}^+$  channels when bumetanide has blocked the  $\text{Na}^+/\text{K}^+/\text{2Cl}^-$  cotransporter.

Support of this work by the National Science Foundation is gratefully acknowledged (IBN 0078058).

#### References

- Audsley, N., Coast, G. M. and Schooley, D. A. (1993). The effects of *Manduca sexta* diuretic hormone on fluid transport by the Malpighian tubules and cryptonephric complex of *Manduca sexta*. *J. Exp. Biol.* **178**, 231-243.
- Baldrick, P., Hyde, D. and Anstee, J. H. (1988). Microelectrode studies on Malpighian tubule cells of *Locusta migratoria*. Effects of external ions and inhibitors. *J. Insect Physiol.* **34**, 963-976.
- Beyenbach, K. W. (1995). Mechanism and regulation of electrolyte transport in Malpighian tubules. *J. Insect Physiol.* **41**, 197-207.



- Beyenbach, K. W.** (2001). Energizing epithelial transport with the vacuolar H<sup>+</sup>-ATPase. *News Physiol. Sci.* **16**, 145-151.
- Beyenbach, K. W. and Masia, R.** (2002). Membrane conductances of principal cells in Malpighian tubules of *Aedes aegypti*. *J. Insect Physiol.* **48**, 375-386.
- Beyenbach, K. W. and Petzel, D. H.** (1987). Diuresis in mosquitoes: role of a natriuretic factor. *News Physiol. Sci.* **2**, 171-175.
- Brzuszcak, I. M., Zhao, J., Bell, C., Stiel, D., Fielding, I., Percy, J., Smith, R. and O'Loughlin, E. V.** (1996). Cyclic AMP-dependent anion secretion in human small and large intestine. *J. Gastroenterol. Hepatol.* **11**, 804-810.
- Gillen, C. M. and Bowles, D. W.** (2001). Kinetic characterization of a K-Cl cotransporter from the insect cell line Sf9. *FASEB J.* **15**, A412.
- Hegarty, J. L., Zhang, B., Carroll, M. C., Cragoe, E. J. J. and Beyenbach, K. W.** (1992). Effects of amiloride on isolated Malpighian tubules of the yellow fever mosquito (*Aedes aegypti*). *J. Insect Physiol.* **38**, 329-337.
- Hegarty, J. L., Zhang, B., Pannabecker, T. L., Petzel, D. H., Baustian, M. D. and Beyenbach, K. W.** (1991). Dibutyl cAMP activates bumetanide-sensitive electrolyte transport in Malpighian tubules. *Am. J. Physiol. Cell Physiol.* **261**, C521-C529.
- Helman, S. I.** (1972). Determination of electrical resistance of the isolated cortical collecting tubule and its possible anatomical location. *Yale J. Biol. Med.* **45**, 339-345.
- Hopkin, R., Anstee, J. H. and Bowler, K.** (2001). An investigation into the effects of inhibitors of fluid production by *Locusta* Malpighian tubule type I cells on their secretion and elemental composition. *J. Insect Physiol.* **47**, 359-367.
- Huang, D. Y., Osswald, H. and Vallon, V.** (2000). Sodium reabsorption in thick ascending limb of Henle's loop: effect of potassium channel blockade in vivo. *Br. J. Pharmacol.* **130**, 1255-1262.
- Hurst, A. M., Duplain, M. and Lapointe, J. Y.** (1992). Basolateral membrane potassium channels in rabbit cortical thick ascending limb. *Am. J. Physiol. Cell Physiol.* **263**, F262-F267.
- Hyde, D., Baldrick, P., Marshall, S. L. and Anstee, J. H.** (2001). Rubidium reduces potassium permeability and fluid secretion in Malpighian tubules of *Locusta migratoria*. *L. J. Insect Physiol.* **47**, 629-637.
- Ianowski, J. P., Christensen, R. J. and O'Donnell, M. J.** (2001). Intracellular ion activities in Malpighian tubule cells of *Rhodnius prolixus*: evaluation of Na/K/2Cl cotransport across the basolateral membrane. *J. Exp. Biol.* **205**, 1645-1655.
- Labarca, P., Santi, C., Zapata, O., Morales, E., Beltr'an, C., Li'evano, A. and Darszon, A.** (1996). A cAMP regulated K<sup>+</sup>-selective channel from the sea urchin sperm plasma membrane. *Dev. Biol.* **174**, 271-280.
- Leyssens, A., Dijkstra, S., Van Kerkhove, E. and Steels, P.** (1994). Mechanisms of K<sup>+</sup> uptake across the basal membrane of Malpighian tubules of *Formica polyctena*: the effect of ions and inhibitors. *J. Exp. Biol.* **195**, 123-145.
- Leyssens, A., Zhang, S.-L., Van Kerkhove, E. and Steels, P.** (1993). Both dinitrophenol and Ba<sup>2+</sup> reduce KCl and fluid secretion in Malpighian tubules of *Formica*: the role of the apical H<sup>+</sup> and K<sup>+</sup> concentration gradient. *J. Insect Physiol.* **39**, 1061-1073.
- Linton, S. M. and O'Donnell, M. J.** (1999). Contributions of K<sup>+</sup>/Cl<sup>-</sup> cotransport and Na<sup>+</sup>/K<sup>+</sup>-ATPase to basolateral ion transport in Malpighian tubules of *Drosophila melanogaster*. *J. Exp. Biol.* **202**, 1561-1570.
- Marunaka, Y., Niisato, N., O'Brodovich, H., Post, M. and Tanswell, A. K.** (1999). Roles of Ca<sup>2+</sup> and protein tyrosine kinase in insulin action on cell volume via Na<sup>+</sup> and K<sup>+</sup> channels and Na<sup>+</sup>/K<sup>+</sup>/2Cl<sup>-</sup> cotransporter in fetal rat alveolar type II pneumocyte. *J. Membr. Biol.* **168**, 91-101.
- Masia, R., Aneshansley, D., Nagel, W., Nachman, R. J. and Beyenbach, K. W.** (2000). Voltage clamping single cells in intact Malpighian tubules of mosquitoes. *Am. J. Physiol. Renal Physiol.* **279**, F747-F754.
- Neufeld, D. S. and Leader, J. P.** (1998). Electrochemical characteristics of ion secretion in Malpighian tubules of the New Zealand alpine weta (*Hemideina maori*). *J. Insect Physiol.* **44**, 39-48.
- Nicolson, S. W. and Isaacson, L. C.** (1987). Transepithelial and intracellular potentials in isolated Malpighian tubules of tenebrionid beetle. *Am. J. Physiol. Renal Physiol.* **252**, F645-F653.
- O'Donnell, M. J. and Maddrell, S. H. P.** (1984). Secretion by the Malpighian tubules of *Rhodnius prolixus*. Electrical events. *J. Exp. Biol.* **110**, 275-290.
- O'Neill, W. C. and Steinberg, D. F.** (1995). Functional coupling of Na<sup>+</sup>-K<sup>+</sup>-2Cl<sup>-</sup> cotransport and Ca<sup>2+</sup>-dependent K<sup>+</sup> channels in vascular endothelial cells. *Am. J. Physiol. Cell Physiol.* **269**, C267-C274.
- Pannabecker, T. L., Hayes, T. K. and Beyenbach, K. W.** (1993). Regulation of epithelial shunt conductance by the peptide leucokinin. *J. Membr. Biol.* **132**, 63-76.
- Petzel, D. H.** (2000). Na/H exchange in mosquito Malpighian tubules. *Am. J. Physiol. Regul. Integr. Comp. Physiol.* **279**, R1996-R2003.
- Petzel, D. H., Berg, M. M. and Beyenbach, K. W.** (1987). Hormone-controlled cAMP-mediated fluid secretion in yellow-fever mosquito. *Am. J. Physiol. Regul. Integr. Comp. Physiol.* **253**, R701-R711.
- Petzel, D. H., Hagedorn, H. H. and Beyenbach, K. W.** (1985). Preliminary isolation of mosquito natriuretic factor. *Am. J. Physiol. Regul. Integr. Comp. Physiol.* **249**, R379-R386.
- Ramsay, J. A.** (1953). Active transport of potassium by the Malpighian tubules of insects. *J. Exp. Biol.* **93**, 358-369.
- Reagan, J. D.** (1995). Molecular cloning of a putative Na<sup>+</sup>-K<sup>+</sup>-2Cl<sup>-</sup> cotransporter from the Malpighian tubules of the tobacco hornworm, *Manduca sexta*. *Insect Biochem. Molec. Biol.* **25**, 875-880.
- Singh, S. K., Mennone, A., Gigliozzi, A., Fraioli, F. and Boyer, J. L.** (2001). Cl<sup>-</sup> dependent secretory mechanisms in isolated rat bile duct epithelial units. *Am. J. Physiol. Gastrointest. Physiol.* **281**, G438-G446.
- Suzuki, M., Takahashi, K. and Sakai, O.** (1994). Regulation by GTP of a Ca<sup>2+</sup>-activated K<sup>+</sup> channel in the apical membrane of rabbit cortical collecting duct cells. *J. Membr. Biol.* **141**, 43-50.
- Teulon, J., Ronco, P. M. and Vandewalle, A.** (1994). Renal cells transformed with SV40 contain a high-conductance calcium-insensitive potassium channel. *Am. J. Physiol. Cell Physiol.* **267**, C940-C945.
- Walter, S. J., Shirley, D. G., Folkard, E. J. and Unwin, R. J.** (2001). Effects of the potassium channel blocker barium on sodium and potassium transport in the rat loop of Henle in vivo. *Exp. Physiol.* **86**, 469-474.
- Wang, T.** (2003). The effects of the potassium channel opener minoxidil on renal electrolytes transport in the loop of Henle. *J. Pharm. Exp. Therap.* **304**, 833-840.
- Wessing, A., Bertram, G. and Zierold, K.** (1993). Effects of bafilomycin A1 and amiloride on the apical potassium and proton gradients in *Drosophila* Malpighian tubules studied by X-ray microanalysis and microelectrode measurements. *J. Comp. Physiol. B* **163**, 452-462.
- Wiehart, U. I., Klein, G., Steels, P., Nicolson, S. W. and Van Kerkhove, E.** (2003a). K<sup>+</sup> transport in Malpighian tubules of *Tenebrio molitor* L: is a K(ATP) channel involved? *J. Exp. Biol.* **206**, 959-965.
- Wiehart, U. I., Nicolson, S. W. and Van Kerkhove, E.** (2003b). K<sup>+</sup> transport in Malpighian tubules of *Tenebrio molitor* L: a study of electrochemical gradients and basal K<sup>+</sup> uptake mechanisms. *J. Exp. Biol.* **206**, 949-957.
- Williams, J. C. and Beyenbach, K. W.** (1983). Differential effects of secretagogues on Na and K secretion in the Malpighian tubules of *Aedes aegypti* (L.). *J. Comp. Physiol.* **149**, 511-517.
- Williams, J. C. and Beyenbach, K. W.** (1984). Differential effects of secretagogues on the electrophysiology of the Malpighian tubules of the yellow fever mosquito. *J. Comp. Physiol. B* **154**, 301-309.
- Wu, D. S. and Beyenbach, K. W.** (2003). The dependence of electrical transport pathways in Malpighian tubules on ATP. *J. Exp. Biol.* **206**, 233-243.
- Xu, W. and Marshall, A. T.** (1999a). Effects of inhibitors and specific ion-free salines on segmental fluid secretion by the Malpighian tubules of the black field cricket *Teleogryllus oceanicus*. *J. Insect Physiol.* **45**, 835-842.
- Xu, W. and Marshall, A. T.** (1999b). X-ray microanalysis of the Malpighian tubules of the black field cricket *Teleogryllus oceanicus*: The roles of Na/K ATPase and the Na/K/2Cl cotransporter. *J. Insect Physiol.* **45**, 885-893.
- Yu, M. J. and Beyenbach, K. W.** (2002). Leucokinin activates Ca<sup>2+</sup>-dependent signal pathway in principal cells of *Aedes aegypti* Malpighian tubules. *Am. J. Physiol. Renal Physiol.* **283**, F499-F508.
- Yu, M. J., Schooley, D. A. and Beyenbach, K. W.** (2003). Cyclic GMP induces a basolateral membrane chloride conductance in principal cells of *Aedes aegypti* Malpighian tubules. *FASEB J.* **17**, A481.
